# Supplementary material for: Identification and Characterisation of Infiltrating Immune Cells in Malignant Pleural Mesothelioma Using Spatial Transcriptomics
Source: MDPI journal article supplement (doi:10.3390/mps6020035), 2023-03-28
Supplement: s1 [file s1]

## Supplementary materials

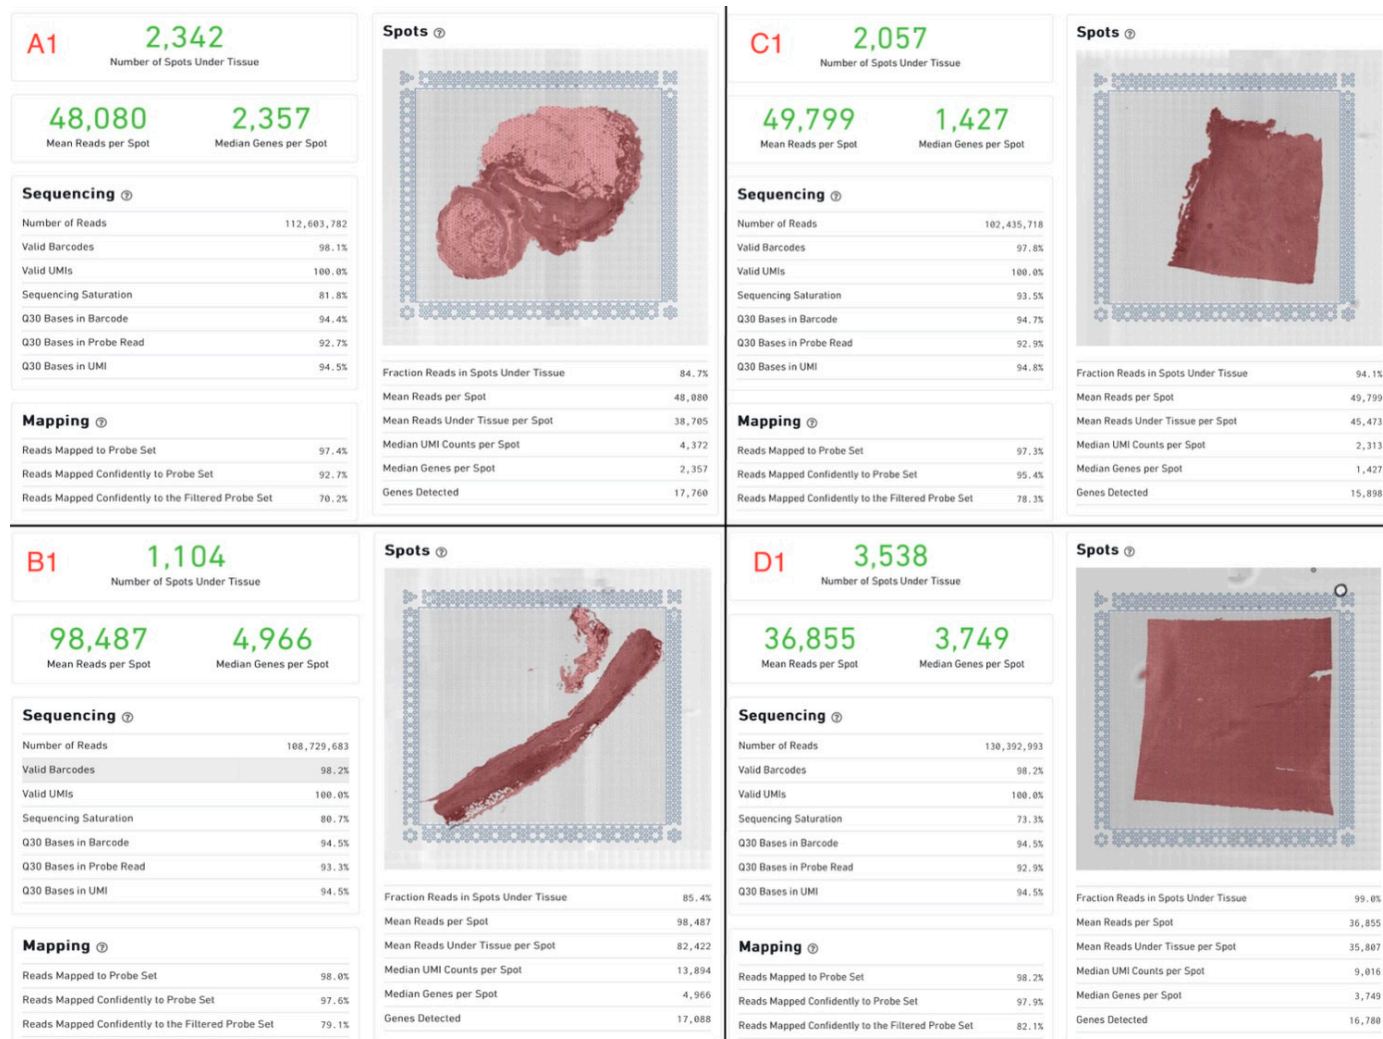

**Figure S1.** Technical Summary reports of spatially resolved transcriptomics datasets. Reports were obtained from Space Ranger software (10X Genomics) demonstrating sequencing efficiency and coverage. We detected a median of 6,694 Unique Molecular Identifier (UMI) counts per spot across all studied samples with a mean of 50,601 reads under tissue per spot.

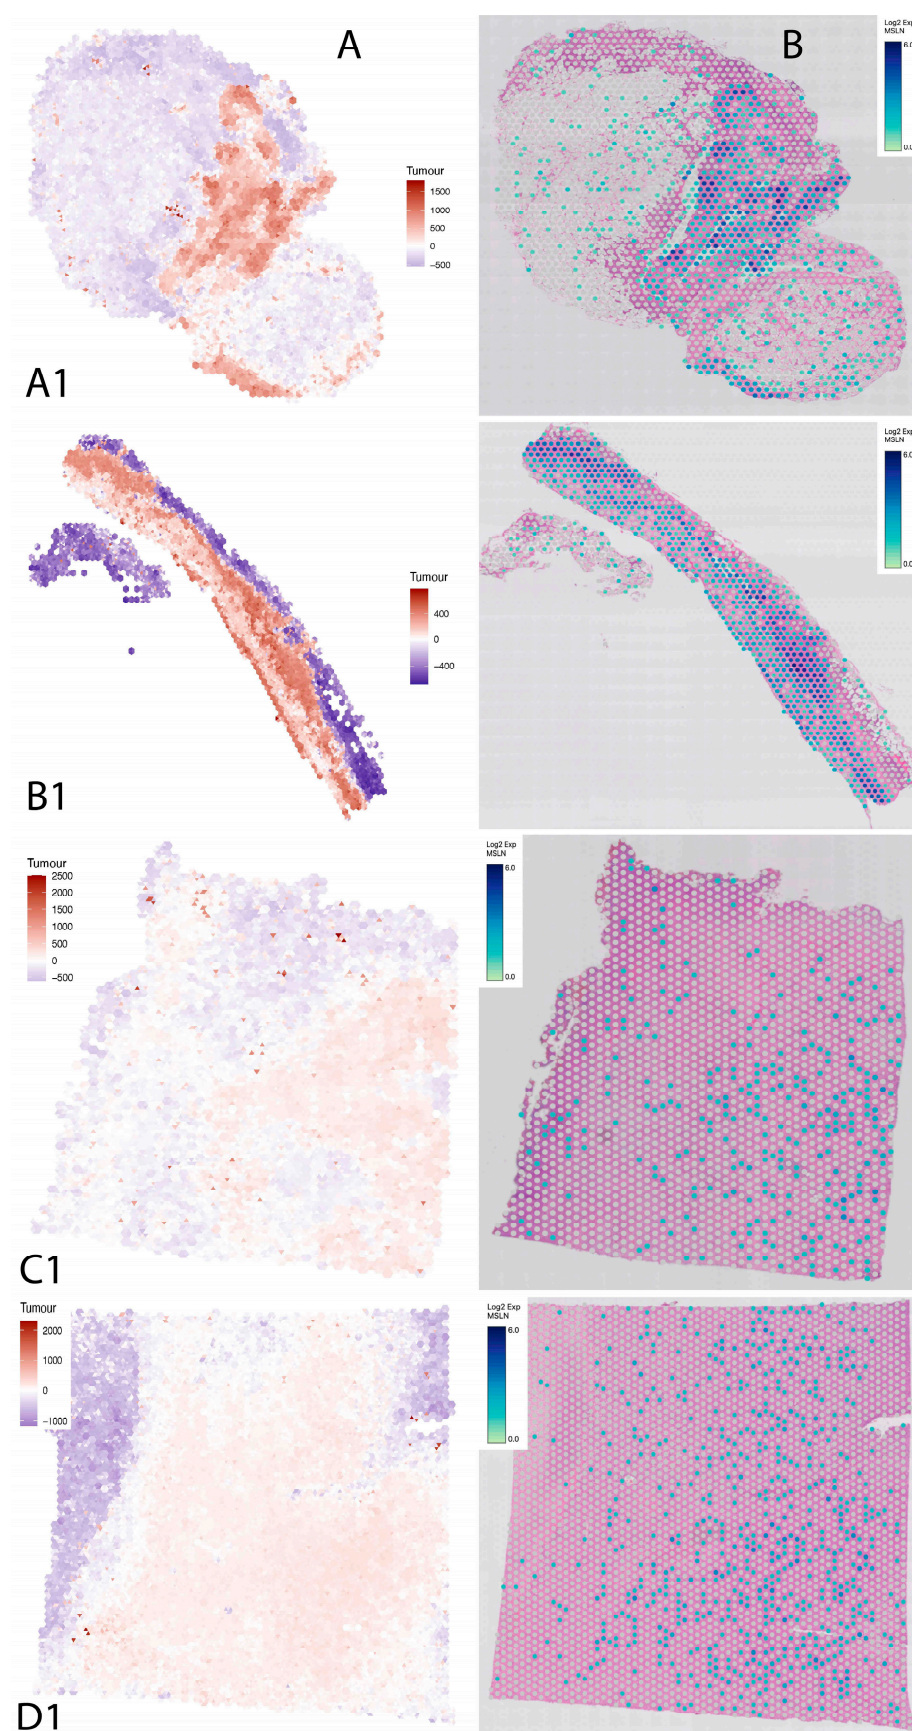

**Figure S2.** Identification of malignant cells in examined tissues. A – Tumour cells identified with BayesSpace (a set of genes was used to precisely locate malignant cells). B – Tumour cells identified with Loupe browser using *MSLN* (mesothelin) gene as a specific MPM gene.
